# Supplementary material
Source: PubMed Central journal article supplement (PMC5621942)
Supplement: supp_5.3.E724_2017-0089-1-at.pdf [file supp_5.3.E724_2017-0089-1-at.pdf]

**Appendix 1 (as supplied by the author): Top Promoted Drugs, by Year**

| Generic name                           | Brand name        | Amount spent on promotion (details + journal ads (000)) |       |       | Therapeutic rating (PMPRB and/or Prescrire) |                           |                               |
|----------------------------------------|-------------------|---------------------------------------------------------|-------|-------|---------------------------------------------|---------------------------|-------------------------------|
|                                        |                   | 2013                                                    | 2014  | 2015  | Major therapeutic gain                      | Moderate therapeutic gain | Little or no therapeutic gain |
| Acidinium                              | Tudorza Genair    |                                                         |       | 5608  |                                             |                           | 1                             |
| Apixaban                               | Eliquis           | 9372                                                    | 6666  | 7653  |                                             |                           | 1                             |
| Aripiprazole                           | Abilify           | 5274                                                    | 7019  | 7046  |                                             |                           | 1                             |
| Canagliflozin                          | Invokana          |                                                         | 7513  | 13037 |                                             |                           | 1                             |
| Celecoxib                              | Celebrex          | 5851                                                    | 3826  |       |                                             |                           | 1                             |
| Ciclesonide                            | Alvesco           | 4968                                                    | 4702  | 3634  |                                             |                           | 1                             |
| Colesevelam                            | Lodalis           |                                                         | 3535  | 4478  |                                             |                           | 1                             |
| Dabigatran                             | Pradaxa           | 7867                                                    | 6111  | 4143  |                                             |                           | 1                             |
| Dapagliflozin                          | Forxiga           |                                                         |       | 10344 |                                             |                           | 1                             |
| Denosumab                              | Prolia            | 5816                                                    | 5836  | 6515  |                                             | 1                         |                               |
| Desvenlafaxine                         | Pristiq           | 7901                                                    | 6952  | 8437  |                                             |                           | 1                             |
| Dexlansoprazole                        | Dexilant          | 8266                                                    | 8473  | 7570  |                                             |                           | 1                             |
| Duloxetine                             | Cymbalta          | 8511                                                    | 9466  | 4835  |                                             |                           | 1                             |
| Efinaconazole                          | Jublia            |                                                         |       | 3304  |                                             |                           | 1                             |
| Escitaloprim                           | Cipraxel          | 5515                                                    | 3322  |       |                                             |                           | 1                             |
| Fesoterodine                           | Toviaz            | 4653                                                    | 4899  | 3741  |                                             |                           | 1                             |
| Fluticasone                            | Avamys            | 9321                                                    | 7921  | 4221  |                                             |                           | 1                             |
| Fluticasone and vilanterol             | Breo Ellipta      |                                                         | 4669  | 15655 |                                             |                           | 1                             |
| Indacaterol                            | Onbrez Breezhaler | 3460                                                    | 3624  |       |                                             |                           | 1                             |
| Linaclotide                            | Constella         |                                                         |       | 6786  |                                             |                           | 1                             |
| Linagliptin                            | Trajenta          | 6249                                                    | 4956  | 3810  |                                             |                           | 1                             |
| Liraglutide                            | Victoza           | 6536                                                    | 4159  | 3517  |                                             |                           | 1                             |
| Lisdexamfetamine                       | Vyvanse           | 4145                                                    | 3578  | 3287  |                                             |                           | 1                             |
| Lurasidone                             | Latuda            |                                                         | 4045  | 3660  |                                             |                           | 1                             |
| Mirabegron                             | Myrbetriq         |                                                         | 3097  | 8094  |                                             |                           | 1                             |
| Multicomponent meningococcal B vaccine | Bexsero           |                                                         | 3711  |       | 1                                           |                           |                               |
| Nebivolol                              | Bystolic          | 3440                                                    |       |       |                                             |                           | 1                             |
| Olmesartan                             | Olmotec           | 3299                                                    | 2850  | 3027  |                                             |                           | 1                             |
| Perindopril                            | Coversyl          | 12279                                                   | 14134 | 17130 |                                             |                           | 1                             |
| Pregabalin                             | Lyrica            | 3209                                                    |       |       |                                             |                           | 1                             |
| Prucalopride                           | Resotran          | 5636                                                    |       |       |                                             |                           | 1                             |

|                                             |                   |       |       |       |   |   |   |
|---------------------------------------------|-------------------|-------|-------|-------|---|---|---|
| Recombinant human papillomavirus            | Gardasil          |       |       | 3359  | 1 |   |   |
| Rivaroxaban                                 | Xarelto           | 10857 | 11995 | 11486 |   |   | 1 |
| Saxagliptin                                 | Onglyza           | 3575  |       | 3535  |   |   | 1 |
| Silodosin                                   | Rapaflo           | 4743  | 3034  |       |   |   | 1 |
| Sitagliptin                                 | Januvia           | 3404  |       | 2934  |   |   | 1 |
| Solifenacin                                 | Vesicare          | 3006  |       |       |   |   | 1 |
| Tadalafil                                   | Cialis            | 4245  | 3748  | 2757  |   |   | 1 |
| Tiotropium                                  | Spiriva           | 4417  | 5647  |       |   |   | 1 |
| Ulipristal                                  | Fibristal         |       | 3514  | 2753  |   | 1 |   |
| Umecliniium and vilanterol                  | Anoro Ellipta     |       |       | 6769  |   |   | 1 |
| Vortioxetine                                | Trintellix        |       |       | 12146 |   |   | 1 |
| <b>Therapeutic Evaluation Not Available</b> |                   |       |       |       |   |   |   |
| Acidinium                                   | Tudorza           |       | 4345  |       |   |   |   |
| Adapalene and benzoyl peroxide              | Tactuo            | 3185  |       |       |   |   |   |
| Adapalene and benzoyl peroxide              | Tactupump         |       | 3359  | 2905  |   |   |   |
| Budesonide and formoterol                   | Symbicort         | 10675 | 12133 | 9707  |   |   |   |
| Buprenorphine                               | Butrans           |       |       | 4171  |   |   |   |
| Calcipotriol and betamethasone              | Dovobet           | 3847  |       |       |   |   |   |
| Ciclesonide                                 | Omnaris           | 4153  | 4099  |       |   |   |   |
| Clarithromycin                              | Biaxin XL         | 7422  | 4172  |       |   |   |   |
| Epinephrine                                 | Allerject         | 3222  | 2870  |       |   |   |   |
| Escitaloprim                                | Cipralext Meltz   | 4441  |       |       |   |   |   |
| Esomeprazole and naproxen                   | Vimovo            | 8343  | 99043 | 5217  |   |   |   |
| Fluticasone and salmeterol                  | Advair            | 7328  |       |       |   |   |   |
| Fluticasone and salmeterol                  | Advair 100 Diskus |       | 5006  |       |   |   |   |
| Fluticasone and salmeterol                  | Advair 125        |       | 5227  |       |   |   |   |
| Fluticasone and salmeterol                  | Advair Diskus     | 7601  |       |       |   |   |   |
| Gliclazide                                  | Daimicron MR      | 3044  |       |       |   |   |   |
| Glycopyrronium                              | Seebri            |       | 4785  |       |   |   |   |

|                                           |                    |      |      |      |  |  |  |
|-------------------------------------------|--------------------|------|------|------|--|--|--|
|                                           | Breezhaler         |      |      |      |  |  |  |
| Glycopyrronium and indacaterol            | Ultibro Breezhaler |      |      | 5376 |  |  |  |
| Guanfacine                                | Intuniv XR         |      | 2922 |      |  |  |  |
| Iron                                      | Feramax            | 3348 | 3468 | 2752 |  |  |  |
| Methylphenidate                           | Biphentin          |      | 3790 | 3243 |  |  |  |
| Methylphenidate                           | Concerta           |      | 3666 | 3802 |  |  |  |
| Mometasone                                | Nasonex            | 3394 |      |      |  |  |  |
| Mometasone and formoterol                 | Zenhale            | 5359 | 5550 | 5624 |  |  |  |
| Norethindrone acetate - ethinyl estradiol | Lolo               |      | 6513 | 7699 |  |  |  |
| Oxycodone                                 | OxyNEO             | 3014 |      |      |  |  |  |
| Oxycodone and naloxone                    | Targin             | 3718 |      |      |  |  |  |
| Pantoprazole magnesium                    | Tecta              | 8604 | 7615 | 3670 |  |  |  |
| Perindopril                               | Coversyl Plus      |      |      | 3629 |  |  |  |
| Quetiapine                                | Seroquel XR        | 3487 |      |      |  |  |  |
| Saxagliptin and metformin                 | Komboglyze         | 3478 | 3205 |      |  |  |  |
| Sitagliptin and metformin                 | Janumet            | 3590 |      |      |  |  |  |
| Sitagliptin and metformin                 | Janumet XR         |      | 5183 | 3359 |  |  |  |
| Tiotropium                                | Inspiolto Respimat |      |      | 2779 |  |  |  |
| Tiotropium                                | Spiriva Respimat   |      |      | 5791 |  |  |  |
| Trandolapril                              | Mavik              | 7436 | 6966 | 8104 |  |  |  |
| Zolpidem                                  | Sublinox           | 3633 |      |      |  |  |  |
