# Supplementary material
Source: PubMed Central journal article supplement (PMC5621942)
Supplement: supp_5.3.E724_2017-0089_Original_submission.pdf [file supp_5.3.E724_2017-0089_Original_submission.pdf]

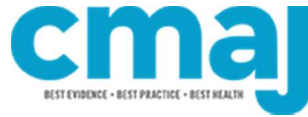

## The relationship between promotional spending on drugs and their therapeutic gain: a cohort analysis

|                               |                                                                                                                                                                                                                                                                                                                                                                                                                                                                                                                                                                                                                                                                                                                                                                                                                                                                                                                                                                                                                                                                                                                                                                                                                                                                                                                                                                                                                                                                                                                                                                                                                                                                                                    |
|-------------------------------|----------------------------------------------------------------------------------------------------------------------------------------------------------------------------------------------------------------------------------------------------------------------------------------------------------------------------------------------------------------------------------------------------------------------------------------------------------------------------------------------------------------------------------------------------------------------------------------------------------------------------------------------------------------------------------------------------------------------------------------------------------------------------------------------------------------------------------------------------------------------------------------------------------------------------------------------------------------------------------------------------------------------------------------------------------------------------------------------------------------------------------------------------------------------------------------------------------------------------------------------------------------------------------------------------------------------------------------------------------------------------------------------------------------------------------------------------------------------------------------------------------------------------------------------------------------------------------------------------------------------------------------------------------------------------------------------------|
| Journal:                      | <i>CMAJ</i>                                                                                                                                                                                                                                                                                                                                                                                                                                                                                                                                                                                                                                                                                                                                                                                                                                                                                                                                                                                                                                                                                                                                                                                                                                                                                                                                                                                                                                                                                                                                                                                                                                                                                        |
| Manuscript ID                 | CMAJ-17-0536                                                                                                                                                                                                                                                                                                                                                                                                                                                                                                                                                                                                                                                                                                                                                                                                                                                                                                                                                                                                                                                                                                                                                                                                                                                                                                                                                                                                                                                                                                                                                                                                                                                                                       |
| Manuscript Type:              | Research - Cohort study (retrospective)                                                                                                                                                                                                                                                                                                                                                                                                                                                                                                                                                                                                                                                                                                                                                                                                                                                                                                                                                                                                                                                                                                                                                                                                                                                                                                                                                                                                                                                                                                                                                                                                                                                            |
| Date Submitted by the Author: | 05-May-2017                                                                                                                                                                                                                                                                                                                                                                                                                                                                                                                                                                                                                                                                                                                                                                                                                                                                                                                                                                                                                                                                                                                                                                                                                                                                                                                                                                                                                                                                                                                                                                                                                                                                                        |
| Complete List of Authors:     | Lexchin, Joel; York University, School of Health Policy and Management;                                                                                                                                                                                                                                                                                                                                                                                                                                                                                                                                                                                                                                                                                                                                                                                                                                                                                                                                                                                                                                                                                                                                                                                                                                                                                                                                                                                                                                                                                                                                                                                                                            |
| Keywords:                     | Drugs, Health Policy, Medicine and Pharmaceutical Industry                                                                                                                                                                                                                                                                                                                                                                                                                                                                                                                                                                                                                                                                                                                                                                                                                                                                                                                                                                                                                                                                                                                                                                                                                                                                                                                                                                                                                                                                                                                                                                                                                                         |
| More Detailed Keywords:       | therapeutic gain, promotion                                                                                                                                                                                                                                                                                                                                                                                                                                                                                                                                                                                                                                                                                                                                                                                                                                                                                                                                                                                                                                                                                                                                                                                                                                                                                                                                                                                                                                                                                                                                                                                                                                                                        |
| Abstract:                     | <p><b>Background</b><br/>The value of promotion in helping doctors prescribe appropriately is debated. This study looks at the most heavily promoted drugs and their therapeutic gain to help determine whether doctors should be using promotional material to inform themselves about therapeutically important drugs.</p> <p><b>Methods</b><br/>Lists were constructed of the most heavily promoted drugs and the top selling drugs by dollar value for 2013, 2014 and 2015. Therapeutic gain was categorized as major, moderate or little to no and was determined by examining ratings from the Patented Medicine Prices Review Board and the French drug bulletin Prescrire International. For each of the three years, the number of drugs in the three therapeutic categories for drugs in both groups was compared. The amount and percent of money spent on promotion for drugs in each of the three therapeutic categories for the three years was also determined.</p> <p><b>Results</b><br/>Therapeutic ratings were available for 42 of the most heavily promoted drugs and 40 of the top selling drugs. The distribution of therapeutic gain for drugs in both groups was not statistically different in any of the three years. Nearly all the money spent on promotion in each of the three years went to drugs with little to no therapeutic gain.</p> <p><b>Interpretation</b><br/>Most of the money spent on promotion went to drugs that offer little to no therapeutic gain. This result calls whether doctors should read journal advertisements or see sales representatives if their purpose in doing so is to acquire information about important medical therapies.</p> |

1  
2  
3  
4  
5  
6  
7  
8  
9  
10  
11  
12  
13  
14  
15  
16  
17  
18  
19  
20  
21  
22  
23  
24  
25  
26  
27  
28  
29  
30  
31  
32  
33  
34  
35  
36  
37  
38  
39  
40  
41  
42  
43  
44  
45  
46  
47  
48  
49  
50  
51  
52  
53  
54  
55  
56  
57  
58  
59  
60

SCHOLARONE™  
Manuscripts

Confidential

1  
2  
3 **The relationship between promotional spending on drugs and their therapeutic gain: a**  
4 **cohort analysis**  
5  
6

7  
8 Joel Lexchin MSc, MD  
9

10 Professor Emeritus

11 School of Health Policy and Management

12 York University

13 *and*

14 Emergency Physician

15 University Health Network  
16  
17  
18  
19  
20  
21  
22  
23  
24  
25  
26  
27  
28  
29  
30  
31  
32  
33  
34  
35  
36  
37  
38  
39  
40  
41  
42  
43  
44  
45  
46  
47  
48  
49  
50  
51  
52  
53  
54  
55  
56  
57  
58  
59  
60

Correspondence:

Joel Lexchin MD

School of Health Policy and Management

York University

4700 Keele St.

Toronto, ON M3J 1P3

Tel: 416-964-7186

Email: [jlexchin@yorku.ca](mailto:jlexchin@yorku.ca)

ORCID ID: 0000-0001-5120-8029

**Funding:** There was no funding associated with this study.

**Competing interests:** In 2015-2016 Joel Lexchin received payment from two non-profit organizations for being a consultant on a project looking at indication based prescribing and a second looking at which drugs should be distributed free of charge by general practitioners.

1  
2  
3  
4  
5  
6  
7  
8  
9  
10  
11  
12  
13  
14  
15  
16  
17  
18  
19  
20  
21  
22  
23  
24  
25  
26  
27  
28  
29  
30  
31  
32  
33  
34  
35  
36  
37  
38  
39  
40  
41  
42  
43  
44  
45  
46  
47  
48  
49  
50  
51  
52  
53  
54  
55  
56  
57  
58  
59  
60

In 2015 he received payment from a for-profit organization for being on a panel that discussed expanding drug insurance in Canada. He is on the Foundation Board of Health Action International.

Confidential

## Abstract

### Background

The value of promotion in helping doctors prescribe appropriately is debated. This study looks at the most heavily promoted drugs and their therapeutic gain to help determine whether doctors should be using promotional material to inform themselves about therapeutically important drugs.

### Methods

Lists were constructed of the most heavily promoted drugs and the top selling drugs by dollar value for 2013, 2014 and 2015. Therapeutic gain was categorized as major, moderate or little to no and was determined by examining ratings from the Patented Medicine Prices Review Board and the French drug bulletin Prescrire International. For each of the three years, the number of drugs in the three therapeutic categories for drugs in both groups was compared. The amount and percent of money spent on promotion for drugs in each of the three therapeutic categories for the three years was also determined.

### Results

Therapeutic ratings were available for 42 of the most heavily promoted drugs and 40 of the top selling drugs. The distribution of therapeutic gain for drugs in both groups was not statistically different in any of the three years. Nearly all the money spent on promotion in each of the three years went to drugs with little to no therapeutic gain.

### Interpretation

Most of the money spent on promotion went to drugs that offer little to no therapeutic gain. This result calls whether doctors should read journal advertisements or see sales representatives if their purpose in doing so is to acquire information about important medical therapies.

## Introduction

Pharmaceutical companies often claim that they promote their products in order to bring them to the attention of doctors and to inform doctors about them. This orientation is reflected in a statement about the role of pharmaceutical sales representatives issued by Rx&D (now Innovative Medicines Canada): “Provider-supported detailing generates awareness about new treatments and provides science-based and Health Canada approved advice on how to administer these medications” (1). Ads for medicines that appear in Canadian medical journals are prescreened by the independent Pharmaceutical Advertising Advisory Board to ensure compliance with the PAAB Code of Advertising Acceptance, a code that is endorsed by companies belonging to Innovative Medicines Canada. In part, the mandate of the PAAB reads: “The PAAB reviews materials developed by pharmaceutical manufacturers predominantly for the purpose of advertising or promoting...a product to healthcare professionals and increasing their awareness of that brand” (2).

There is general acceptance that the use of promotion by doctors influences their prescribing behaviour, although there is disagreement about the direction of that influence – towards more or less rational prescribing (3, 4) and therefore disagreement about the value of promotion. This study looks at the most heavily promoted drugs and the therapeutic gain from those products. It also compares the therapeutic gain from the most promoted drugs and the top selling drugs by dollar value. Examining whether the medicines that are heavily promoted are the ones that provide the most therapeutic gain may help in determining whether doctors should be using promotional material to inform themselves about therapeutically important drugs.

## Methods

### *Construction of list of most promoted drugs and top selling drugs*

The annual reports from IMS|Brogan contain information about the amount of money spent on journal ads and visits by sales representatives for the top 50 most promoted drugs in Canada and also list the top 50 products by sales revenue. From the reports for the years 2013, 2014 and 2015 (5-7) the following information was extracted for the top 50 promoted drugs in each year: generic name, brand name and amount spent on promotion. For the top 50 selling products in each year the generic and brand names were recorded. The list of the top 50 products includes devices for measuring blood glucose and these were excluded from the analysis as were generics if the brand name drug was also in the list of top 50 products. Different formulations of the same drug were treated as unique products.

### *Determination of therapeutic gain*

The therapeutic gain from products was determined from information on the website of the Patented Medicine Prices Review Board (PMPRB) (<http://www.pmprb-cepmb.gc.ca/pmpMedicines.asp?x=611>) and the independent French drug bulletin Prescrire International (<http://english.prescrire.org/en/Search.aspx>, subscription required). The PMPRB is a federal agency that is responsible for calculating the maximum introductory price for all new patented medications introduced into the Canadian market. It is important to note that the PMPRB is not a payer and therefore its decisions about therapeutic value are not influenced by how much it might have to pay for the product. As part of the process of determining the price, the PMPRB's independent HDAP determines the therapeutic value of each product it reviews and these evaluations are available on its website (<http://www.pmprb-cepmb.gc.ca/pmpMedicines.asp?x=611>). HDAP determines the ratings for the drugs before the maximum price is established and uses a 4-point scale: breakthrough, substantial improvement, moderate (primary or secondary), slight or no improvement. In deciding on the

1  
2  
3 level of therapeutic innovation HDAP considers two primary factors: increased efficacy and  
4  
5 reduction in incidence or grade of important adverse reactions and nine secondary factors:  
6  
7 route of administration, patient convenience, compliance improvements leading to improved  
8  
9 therapeutic efficacy, caregiver convenience, time required to achieve the optimal therapeutic  
10  
11 effect, duration of usual treatment course, success rate, percentage of affected population  
12  
13 treated effectively and disability avoidance/savings. The primary factors are given the  
14  
15 greatest weight, followed by an assessment of any additional improvement as a result of the  
16  
17 secondary factors (8).  
18  
19  
20

21  
22  
23 Prescrire assesses the therapeutic value of medicines through a multistep process. First, it  
24  
25 “examines the condition or clinical setting for which the drug is proposed; then the natural  
26  
27 course of the disease, the efficacy and safety of existing treatments, and the most relevant  
28  
29 outcome measures. This is followed by a systematic search for clinical data on the efficacy  
30  
31 and adverse effects of the new drug, and an assessment of the level of evidence. Based on  
32  
33 [its] independent analysis of clinical data, [it] form[s] a judgement as to whether or not the  
34  
35 new drug is beneficial for patients or whether or not its harmful effects outweigh the benefit”  
36  
37 (9). Based on its analysis, it rates products using the following 7 categories: bravo (major  
38  
39 therapeutic innovation in an area where previously no treatment was available); a real  
40  
41 advance (important therapeutic innovation but has limitations); offers an advantage (some  
42  
43 value but does not fundamentally change the present therapeutic practice); possibly helpful  
44  
45 (minimal additional value and should not change prescribing habits except in rare  
46  
47 circumstances); nothing new (may be new molecule but is superfluous because does not add  
48  
49 to clinical possibilities offered by previously available products); not acceptable (without  
50  
51 evident benefit but with potential or real disadvantages); judgment reserved (decision  
52  
53 postponed until better data and more thorough evaluation) (10).  
54  
55  
56  
57  
58  
59  
60



### *Analysis*

The categories used by the PMPRB and Prescrire were collapsed into three ratings of therapeutic gain: major therapeutic gain, moderate therapeutic gain and little to no therapeutic gain. (See Table 1.) (The Prescrire category of “judgment reserved” was not used in constructing the rating scale.) Therapeutic gain for each of the most promoted and top selling drugs was assigned based on the rating scale. If both the PMPRB and Prescrire rated a drug and the ratings were different then the highest ranking rating was used. For each of the three years, the number of drugs in the three therapeutic categories for the most promoted and top selling drugs was compared using the Chi square test with  $p < 0.05$  being defined as statistically significant. The amount and percent of money spent on promotion for drugs in each of the three therapeutic categories for the three years was also determined. Statistical calculations were done with Prism 7 (GraphPad Software).

As this study did not involve any patients and all the material was publicly available ethics review was not necessary.

### **Results**

There were 79 unique most promoted drugs over the three years and therapeutic evaluations were available for 42 of these: 2013 – 29/51, 2014 – 30/50 and 2015 – 29/45. (See Appendix 1 for a list of all the drugs, the amount spent on promoting them and their therapeutic rating, where available.) There were 66 unique top selling products; five were excluded, three because they were instruments for measuring blood glucose and two were generics with the brand-name product also among the top 50 for the year. Of the remaining 61 drugs, therapeutic evaluations were available for 40 of them: 2013 – 30/48, 2014 – 29/49 and 2015 –

1  
2  
3 29/46. (See Appendix 2 for a list of all the drugs and their therapeutic rating, where  
4  
5 available.) Only 13 drugs were in both groups.  
6  
7

8  
9  
10 In both groups of drugs the large majority were rated as little to no therapeutic gain: most  
11 promoted drugs 87.9% to 96.4%, top selling drugs 76.7% to 79.3%. (Table 2). The  
12  
13 distribution of therapeutic gain for both groups was not statistically different in any of the  
14  
15 three years (Table 2).  
16  
17

18  
19  
20 Nearly all the money spent on promotion in each of the three years went to drugs with little to  
21 no therapeutic gain: 2013 – 96.5%, 2014 – 92.0%, 2015 – 93.8% (Table 3). In 2013, there  
22  
23 was no money spent promoting drugs offering a major therapeutic gain and even for drugs  
24  
25 with a moderate therapeutic gain the highest percent of promotional spending was only 5.7 in  
26  
27 2014.  
28  
29  
30  
31

### 32 33 34 **Interpretation**

35  
36 Most of the money spent on promotion in the form of journal ads and visits by sales  
37  
38 representatives goes to drugs that offer little to no therapeutic gain. This finding could be  
39  
40 interpreted as meaning that drug companies are not interested in informing doctors about the  
41  
42 drugs that could make a significant difference in the therapy that doctors prescribe for their  
43  
44 patients. However, the finding that there is no difference in the therapeutic distribution  
45  
46 between the most promoted drugs and the top selling drugs could also mean that there are  
47  
48 few drugs that present a major therapeutic gain and therefore few to invest promotional  
49  
50 dollars into. In either case, the conclusion seems to be the same; if doctors want to learn  
51  
52 about drugs that are true advances then using promotion is not the way to do so. Other factors  
53  
54 besides therapeutic gain enter into decisions about what drug to prescribe to an individual  
55  
56  
57  
58  
59  
60

1  
2  
3 patient including patient preferences, adverse reactions to specific drugs, insurance coverage  
4  
5 and other medications a patient is taking. However, none of this information is available  
6  
7 through promotional channels.  
8  
9

10  
11 Interestingly, the companies do not see the need to heavily promote the majority of their best-  
12  
13 selling drugs through journal advertising or visits from sales representatives. It is, of course,  
14  
15 possible that these drugs are being promoted through other methods. Also, the minority of  
16  
17 drugs with a high therapeutic value may sell well without the need to promote them.  
18  
19

20  
21  
22 In 2015, just over a third of Canadian doctors were not seeing sales representatives, but 11%  
23  
24 of saw 6 or more a month (11) and in that year there was a total of 3,720,000 visits, including  
25  
26 111,000 for Coversyl (perindopril, used for high blood pressure), 100,000 for Breo Ellipta  
27  
28 (fluticasone and vilanterol, used for asthma) and 73,000 for Invokana (canagliflozin, used for  
29  
30 diabetes) (7), three of the most heavily promoted drugs examined in this paper. The  
31  
32 comprehensiveness of the safety information provided by sales representatives when they  
33  
34 visit doctors was investigated in a study involving primary care practitioners in Vancouver  
35  
36 and Montreal. “Minimally adequate safety information” defined *a priori* as the mention of 1  
37  
38 or more of the following: approved indications, serious adverse events, common non-serious  
39  
40 adverse events and contraindications *and* no unapproved indications or unqualified safety  
41  
42 claims (e.g., “this drug is safe”) was provided in 5/412 (1.2%) of promotions in Vancouver  
43  
44 and 7/423 (1.7%) in Montreal. Representatives did not provide any information about harms  
45  
46 (a serious adverse event, a common adverse event or a contraindication) in two-thirds of  
47  
48 interactions (12).  
49  
50  
51  
52  
53  
54  
55  
56  
57  
58  
59  
60

1  
2  
3 The pharmaceutical industry spent almost \$563 million on journal advertising and sales  
4  
5 representatives visits with unknown amounts going to the 14 million samples left behind (7),  
6  
7 key opinion leaders to give talks, meetings, direct-to-consumer advertising, booths at medical  
8  
9 conferences and other forms of promotion. Aside from whether the promotion is biased or  
10  
11 not, if the vast majority is going to what are colloquially termed “me too” drugs, is this  
12  
13 money well spent in terms of fulfilling the industry’s professed mandate of providing “access  
14  
15 to education and information about the appropriate uses of our products and services” (13) to  
16  
17 doctors?  
18  
19

20  
21  
22  
23 In a related study, Greenway and Ross used the Open Payments Database set up under the  
24  
25 United States Physicians Payments Sunshine Act to look at the 25 drugs associated with the  
26  
27 largest total payments to physicians and teaching hospitals, excluding research payments,  
28  
29 royalties and licensing fees (14). They found that the most promoted ones had a significantly  
30  
31 lower proportion of “first in class” or “advance in class” drugs compared to the 25 top selling  
32  
33 products and that the most promoted group also contained significantly fewer products on the  
34  
35 World Health Organization’s Essential Medicines List. The similarity in the findings between  
36  
37 their study and this one, in terms of the therapeutic gain from heavily promoted products,  
38  
39 suggests that the pattern of how promotional spending is distributed may be present in  
40  
41 multiple jurisdictions.  
42  
43  
44  
45

#### 46 47 **Limitations**

48  
49 The main limitation to this study is that therapeutic evaluations were only available for 53%  
50  
51 of the most promoted drugs and 66% of the top selling ones. Therefore, distribution of  
52  
53 therapeutic gain in each of these groups may have been different if larger numbers of  
54  
55 products were available for analysis. Neither the PMPRB nor Prescrire revisit their  
56  
57  
58  
59  
60

1  
2  
3 evaluations, except in the case where the initial Prescrire rating is judgment reserved, and it is  
4 possible that a re-evaluation may have resulted in a different rating for some drugs. The  
5 conclusion about the therapeutic gain from the most promoted products is based on money  
6 spent on visits by sales representatives and journal advertising. It is possible, although  
7 unlikely, that other forms of promotion are directed to products with a higher degree of  
8 therapeutic gain. Finally, there is the assumption that the evaluations by PMPRB and/or  
9 Prescrire represent a gold standard in the assessment of a drug's therapeutic gain. While there  
10 is always a legitimate debate about therapeutic gain, the rigorous processes that these  
11 organizations use to arrive at their conclusions and their independence give strong face  
12 validity to their assessments.  
13  
14  
15  
16  
17  
18  
19  
20  
21  
22  
23  
24  
25  
26

### 27 **Conclusion**

28  
29 The focus on promoting primarily drugs with little to no therapeutic gain calls into question  
30 the value of doctors reading journal advertisements or seeing sales representatives if their  
31 purpose in doing so is to acquire information about important medical therapies.  
32  
33  
34  
35  
36  
37  
38  
39  
40  
41  
42  
43  
44  
45  
46  
47  
48  
49  
50  
51  
52  
53  
54  
55  
56  
57  
58  
59  
60

## References

1. Rx&D. Where we stand: detailing. Ottawa: Canada's Research-Based Pharmaceutical Companies; 2010. p. 2.
2. Pharmaceutical Advertising Advisory Board. Code of advertising acceptance Pickering: PAAB; 2013 [cited 2014 September 13]. Available from: <http://www.paab.ca/paab-code.htm>.
3. PhRMA. The facts about pharmaceutical marketing & promotion. Washington DC: 2008.
4. Spurling G, Mansfield PR, Montgomery B, Lexchin J, Doust J, Othman N, et al. Information from pharmaceutical companies and the quality, quantity, and cost of physicians' prescribing: a systematic review. PLoS Medicine. 2010;7:e1000352.
5. Canadian pharmaceutical industry review 2013 Montreal: ims | brogan; 2014 [cited 2017 January 31]. Available from: [http://imsbrogancapabilities.com/YIR\\_2013\\_FINAL](http://imsbrogancapabilities.com/YIR_2013_FINAL).
6. Canadian pharmaceutical industry review 2014 Montreal: imshealth | brogan; 2015 [cited 2017 January 31]. Available from: [http://imsbrogancapabilities.com/YIR\\_2014\\_FINAL](http://imsbrogancapabilities.com/YIR_2014_FINAL).
7. Canadian pharmaceutical industry review 2015 Montreal: imshealth | brogan; 2016 [cited 2017 January 31]. Available from: [http://imsbrogancapabilities.com/YIR\\_2015\\_FINAL](http://imsbrogancapabilities.com/YIR_2015_FINAL).
8. Patented Medicine Prices Review Board. Compendium of policies, guidelines and procedures - reissued June 2013: PMPRB; 2014 [cited 2014 July 20]. Available from: <http://www.pmprb-cepmb.gc.ca/view.asp?ccid=492 - 1637>.
9. Prescrire Editorial Staff. Prescrire's ratings system: gauge the usefulness of new products at glance Paris2011 [cited 2015 March 11]. Available from: <http://english.prescrire.org/en/81/168/46800/0/NewsDetails.aspx>.

- 1  
2  
3 10. Prescrire Editorial Staff. Prescrire's rating system. Prescrire International. 2002;11:43.
- 4  
5 11. Leslie C. Relationship between MDs and pharma changing. Medical Post. 2015  
6  
7 September 15.
- 8  
9 12. Mintzes B, Lexchin J, Sutherland J, Beaulieu M-D, Wilkes M, Durrieu G, et al.  
10  
11 Pharmaceutical sales representatives and patient safety: a comparative prospective study of  
12  
13 information quality in Canada, France and the United States. Journal of General Internal  
14  
15 Medicine. 2013;28:1368-75.
- 16  
17 13. Innovative Medicines Canada. Code of Ethical Practices Ottawa 2016 [cited 2016  
18  
19 October 18]. Available from: [http://innovativemedicines.ca/wp-](http://innovativemedicines.ca/wp-content/uploads/2015/06/IMC_Code_EN.pdf)  
20  
21 [content/uploads/2015/06/IMC\\_Code\\_EN.pdf](http://innovativemedicines.ca/wp-content/uploads/2015/06/IMC_Code_EN.pdf).
- 22  
23 14. Greenway T, Ross J. US drug marketing: how does promotion correspond with  
24  
25 health value? BMJ. 2017;357:j1855.
- 26  
27  
28  
29  
30  
31  
32  
33  
34  
35  
36  
37  
38  
39  
40  
41  
42  
43  
44  
45  
46  
47  
48  
49  
50  
51  
52  
53  
54  
55  
56  
57  
58  
59  
60

Table 1: Therapeutic rating scale

|                               | Patented Medicine Prices Review Board                                                         | Prescrire International*                                                                                    |
|-------------------------------|-----------------------------------------------------------------------------------------------|-------------------------------------------------------------------------------------------------------------|
| Major therapeutic gain        | <ul style="list-style-type: none"><li>breakthrough</li><li>substantial improvement,</li></ul> | <ul style="list-style-type: none"><li>bravo</li><li>a real advance</li></ul>                                |
| Moderate therapeutic gain     | <ul style="list-style-type: none"><li>moderate (primary or secondary)</li></ul>               | <ul style="list-style-type: none"><li>offers an advantage</li></ul>                                         |
| Little to no therapeutic gain | <ul style="list-style-type: none"><li>slight or no improvement</li></ul>                      | <ul style="list-style-type: none"><li>possibly helpful</li><li>nothing new</li><li>not acceptable</li></ul> |

\* The Prescrire category “judgment reserved” was not used.

Confidential



**Table 2: Therapeutic value of most promoted and top selling drugs**

|                                      | 2013                            |                                | 2014                            |                                | 2015                            |                                |
|--------------------------------------|---------------------------------|--------------------------------|---------------------------------|--------------------------------|---------------------------------|--------------------------------|
|                                      | Top promoted drugs – number (%) | Top selling drugs – number (%) | Top promoted drugs – number (%) | Top selling drugs – number (%) | Top promoted drugs – number (%) | Top selling drugs – number (%) |
| <b>Major therapeutic gain</b>        | 0 (0)                           | 5 (16.7)                       | 1 (3.4)                         | 4 (13.8)                       | 1 (3.1)                         | 4 (13.8)                       |
| <b>Moderate therapeutic gain</b>     | 1 (3.6)                         | 2 (6.7)                        | 2 (6.9)                         | 2 (6.9)                        | 2 (6.3)                         | 2 (6.9)                        |
| <b>Little to no therapeutic gain</b> | 27 (96.4)                       | 23 (76.7)                      | 26 (89.7)                       | 23 (79.3)                      | 29 (90.6)                       | 23 (79.3)                      |

2013: Chi square p = 0.0611

2014: Chi square p = 0.3709

2015: Chi square p = 0.3087

Table 3: Amount spent on promotion by therapeutic value

|                               | Promotion spending (\$000) – amount (% of total) |               |               |
|-------------------------------|--------------------------------------------------|---------------|---------------|
|                               | 2013                                             | 2014          | 2015          |
| Major therapeutic gain        | 0 (0)                                            | 3711 (2.3)    | 3359 (1.6)    |
| Moderate therapeutic gain     | 5816 (3.5)                                       | 9350 (5.7)    | 9268 (4.5)    |
| Little to no therapeutic gain | 159999 (96.5)                                    | 149941 (92.0) | 192644 (93.8) |
| Total spending                | 165815                                           | 163002        | 205271        |

Confidential

**Appendix 1: Top Promoted Drugs, by Year**  
**Amount spent on promotion (details + Therapeutic |**  
**journal ads (000)**

| Generic name                           | Brand name        | 2013  | 2014  | 2015  | Major therapeutic gain |
|----------------------------------------|-------------------|-------|-------|-------|------------------------|
| Acidinium                              | Tudorza Genair    |       |       | 5608  |                        |
| Apixaban                               | Eliquis           | 9372  | 6666  | 7653  |                        |
| Aripiprazole                           | Abilify           | 5274  | 7019  | 7046  |                        |
| Canagliflozin                          | Invokana          |       | 7513  | 13037 |                        |
| Celecoxib                              | Celebrex          | 5851  | 3826  |       |                        |
| Ciclesonide                            | Alvesco           | 4968  | 4702  | 3634  |                        |
| Colesevelam                            | Lodalis           |       | 3535  | 4478  |                        |
| Dabigatran                             | Pradaxa           | 7867  | 6111  | 4143  |                        |
| Dapagliflozin                          | Forxiga           |       |       | 10344 |                        |
| Denosumab                              | Prolia            | 5816  | 5836  | 6515  |                        |
| Desvenlafaxine                         | Pristiq           | 7901  | 6952  | 8437  |                        |
| Dexlansoprazole                        | Dexilant          | 8266  | 8473  | 7570  |                        |
| Duloxetine                             | Cymbalta          | 8511  | 9466  | 4835  |                        |
| Efinaconazole                          | Jublia            |       |       | 3304  |                        |
| Escitaloprim                           | Cipralax          | 5515  | 3322  |       |                        |
| Fesoterodine                           | Toviaz            | 4653  | 4899  | 3741  |                        |
| Fluticasone                            | Avamys            | 9321  | 7921  | 4221  |                        |
| Fluticasone and vilatnerol             | Breo Ellipta      |       | 4669  | 15655 |                        |
| Indacaterol                            | Onbrez Breezhaler | 3460  | 3624  |       |                        |
| Linacotide                             | Constella         |       |       | 6786  |                        |
| Linagliptin                            | Trajenta          | 6249  | 4956  | 3810  |                        |
| Liraglutide                            | Victoza           | 6536  | 4159  | 3517  |                        |
| Lisdexamfetamine                       | Vyvanse           | 4145  | 3578  | 3287  |                        |
| Lurasidone                             | Latuda            |       | 4045  | 3660  |                        |
| Mirabegron                             | Myrbetriq         |       | 3097  | 8094  |                        |
| Multicomponent meningococcal B vaccine | Bexsero           |       | 3711  |       | 1                      |
| Nebivolol                              | Bystolic          | 3440  |       |       |                        |
| Olmesartan                             | Olmotec           | 3299  | 2850  | 3027  |                        |
| Perindopril                            | Coversyl          | 12279 | 14134 | 17130 |                        |
| Pregabalin                             | Lyrica            | 3209  |       |       |                        |
| Prucalopride                           | Resotran          | 5636  |       |       |                        |
| Recombinant human papillomavirus       | Gardasil          |       |       | 3359  | 1                      |

|    |                                |                    |                                             |       |       |
|----|--------------------------------|--------------------|---------------------------------------------|-------|-------|
| 1  |                                |                    |                                             |       |       |
| 2  | Rivaroxaban                    | Xarelto            | 10857                                       | 11995 | 11486 |
| 3  | Saxagliptin                    | Onglyza            | 3575                                        |       | 3535  |
| 4  | Sildenafil                     | Rapaflo            | 4743                                        | 3034  |       |
| 5  | Sitagliptin                    | Januvia            | 3404                                        |       | 2934  |
| 6  | Solifenacin                    | Vesicare           | 3006                                        |       |       |
| 7  | Tadalafil                      | Cialis             | 4245                                        | 3748  | 2757  |
| 8  | Tiotropium                     | Spiriva            | 4417                                        | 5647  |       |
| 9  | Ulipristal                     | Fibristal          |                                             | 3514  | 2753  |
| 10 | Umeclidinium and vilanterol    | Anoro Ellipta      |                                             |       | 6769  |
| 11 | Vortioxetine                   | Trintellix         |                                             |       | 12146 |
| 12 |                                |                    | <b>Therapeutic Evaluation Not Available</b> |       |       |
| 13 | Acidinium                      | Tudorza            |                                             | 4345  |       |
| 14 | Adapalene and benzoyl peroxide | Tactuo             | 3185                                        |       |       |
| 15 | Adapalene and benzoyl peroxide | Tactupump          |                                             | 3359  | 2905  |
| 16 | Budesonide and formoterol      | Symbicort          | 10675                                       | 12133 | 9707  |
| 17 | Buprenorphine                  | Butrans            |                                             |       | 4171  |
| 18 | Calcipotriol and betamethasone | Dovobet            | 3847                                        |       |       |
| 19 | Ciclesonide                    | Omnisar            | 4153                                        | 4099  |       |
| 20 | Clarithromycin                 | Biaxin XL          | 7422                                        | 4172  |       |
| 21 | Epinephrine                    | Allerject          | 3222                                        | 2870  |       |
| 22 | Escitaloprim                   | Cipralext Meltz    | 4441                                        |       |       |
| 23 | Esomeprazole and naproxen      | Vimovo             | 8343                                        | 99043 | 5217  |
| 24 | Fluticasone and salmeterol     | Advair             | 7328                                        |       |       |
| 25 | Fluticasone and salmeterol     | Advair 100 Diskus  |                                             | 5006  |       |
| 26 | Fluticasone and salmeterol     | Advair 125         |                                             | 5227  |       |
| 27 | Fluticasone and salmeterol     | Advair Diskus      | 7601                                        |       |       |
| 28 | Gliclazide                     | Daimicron MR       | 3044                                        |       |       |
| 29 | Glycopyrronium                 | Seebri Breezhaler  |                                             | 4785  |       |
| 30 | Glycopyrronium and indacaterol | Ultibro Breezhaler |                                             |       | 5376  |
| 31 | Guanfacine                     | Intuniv XR         |                                             | 2922  |       |
| 32 | Iron                           | Feramax            | 3348                                        | 3468  | 2752  |
| 33 | Methylphenidate                | Biphentin          |                                             | 3790  | 3243  |
| 34 |                                |                    |                                             |       |       |
| 35 |                                |                    |                                             |       |       |
| 36 |                                |                    |                                             |       |       |
| 37 |                                |                    |                                             |       |       |
| 38 |                                |                    |                                             |       |       |
| 39 |                                |                    |                                             |       |       |
| 40 |                                |                    |                                             |       |       |
| 41 |                                |                    |                                             |       |       |
| 42 |                                |                    |                                             |       |       |
| 43 |                                |                    |                                             |       |       |
| 44 |                                |                    |                                             |       |       |
| 45 |                                |                    |                                             |       |       |
| 46 |                                |                    |                                             |       |       |
| 47 |                                |                    |                                             |       |       |
| 48 |                                |                    |                                             |       |       |
| 49 |                                |                    |                                             |       |       |
| 50 |                                |                    |                                             |       |       |
| 51 |                                |                    |                                             |       |       |
| 52 |                                |                    |                                             |       |       |
| 53 |                                |                    |                                             |       |       |
| 54 |                                |                    |                                             |       |       |
| 55 |                                |                    |                                             |       |       |
| 56 |                                |                    |                                             |       |       |
| 57 |                                |                    |                                             |       |       |
| 58 |                                |                    |                                             |       |       |
| 59 |                                |                    |                                             |       |       |
| 60 |                                |                    |                                             |       |       |

|    |                   |                    |      |      |      |
|----|-------------------|--------------------|------|------|------|
| 1  |                   |                    |      |      |      |
| 2  | Methylphenidate   | Concerta           |      | 3666 | 3802 |
| 3  | Mometasone        | Nasonex            | 3394 |      |      |
| 4  | Mometasone and    | Zenhale            | 5359 | 5550 | 5624 |
| 5  | formoterol        |                    |      |      |      |
| 6  | Norethindrone     | Lolo               |      | 6513 | 7699 |
| 7  | acetate - ethinyl |                    |      |      |      |
| 8  | estradiol         |                    |      |      |      |
| 9  | Oxycodone         | OxyNEO             | 3014 |      |      |
| 10 | Oxycodone and     | Targin             | 3718 |      |      |
| 11 | naloxone          |                    |      |      |      |
| 12 | Pantoprazole      | Tecta              | 8604 | 7615 | 3670 |
| 13 | magnesium         |                    |      |      |      |
| 14 | Perindopril       | Coversyl Plus      |      |      | 3629 |
| 15 | Quetiapine        | Seroquel XR        | 3487 |      |      |
| 16 | Saxagliptin and   | Komboglyze         | 3478 | 3205 |      |
| 17 | metformin         |                    |      |      |      |
| 18 | Sitagliptin and   | Janumet            | 3590 |      |      |
| 19 | metformin         |                    |      |      |      |
| 20 | Sitagliptin and   | Janumet XR         |      | 5183 | 3359 |
| 21 | metformin         |                    |      |      |      |
| 22 | Tiotropium        | Inspiroto Respimat |      |      | 2779 |
| 23 | Tiotropium        | Spiriva Respimat   |      |      | 5791 |
| 24 | Trandolapril      | Mavik              | 7436 | 6966 | 8104 |
| 25 | Zolpidem          | Sublinox           | 3633 |      |      |
| 26 |                   |                    |      |      |      |
| 27 |                   |                    |      |      |      |
| 28 |                   |                    |      |      |      |
| 29 |                   |                    |      |      |      |
| 30 |                   |                    |      |      |      |
| 31 |                   |                    |      |      |      |
| 32 |                   |                    |      |      |      |
| 33 |                   |                    |      |      |      |
| 34 |                   |                    |      |      |      |
| 35 |                   |                    |      |      |      |
| 36 |                   |                    |      |      |      |
| 37 |                   |                    |      |      |      |
| 38 |                   |                    |      |      |      |
| 39 |                   |                    |      |      |      |
| 40 |                   |                    |      |      |      |
| 41 |                   |                    |      |      |      |
| 42 |                   |                    |      |      |      |
| 43 |                   |                    |      |      |      |
| 44 |                   |                    |      |      |      |
| 45 |                   |                    |      |      |      |
| 46 |                   |                    |      |      |      |
| 47 |                   |                    |      |      |      |
| 48 |                   |                    |      |      |      |
| 49 |                   |                    |      |      |      |
| 50 |                   |                    |      |      |      |
| 51 |                   |                    |      |      |      |
| 52 |                   |                    |      |      |      |
| 53 |                   |                    |      |      |      |
| 54 |                   |                    |      |      |      |
| 55 |                   |                    |      |      |      |
| 56 |                   |                    |      |      |      |
| 57 |                   |                    |      |      |      |
| 58 |                   |                    |      |      |      |
| 59 |                   |                    |      |      |      |
| 60 |                   |                    |      |      |      |

|    | rating (PMPRB and/or Prescribe) |                               |
|----|---------------------------------|-------------------------------|
|    | Moderate therapeutic gain       | Little or no therapeutic gain |
| 1  |                                 |                               |
| 2  |                                 |                               |
| 3  |                                 |                               |
| 4  |                                 |                               |
| 5  |                                 |                               |
| 6  |                                 |                               |
| 7  |                                 |                               |
| 8  |                                 |                               |
| 9  |                                 |                               |
| 10 |                                 | 1                             |
| 11 |                                 | 1                             |
| 12 |                                 | 1                             |
| 13 |                                 | 1                             |
| 14 |                                 | 1                             |
| 15 |                                 | 1                             |
| 16 |                                 | 1                             |
| 17 |                                 | 1                             |
| 18 |                                 | 1                             |
| 19 |                                 | 1                             |
| 20 |                                 | 1                             |
| 21 |                                 | 1                             |
| 22 | 1                               |                               |
| 23 |                                 |                               |
| 24 |                                 | 1                             |
| 25 |                                 | 1                             |
| 26 |                                 | 1                             |
| 27 |                                 | 1                             |
| 28 |                                 | 1                             |
| 29 |                                 | 1                             |
| 30 |                                 | 1                             |
| 31 |                                 | 1                             |
| 32 |                                 | 1                             |
| 33 |                                 | 1                             |
| 34 |                                 |                               |
| 35 |                                 |                               |
| 36 |                                 | 1                             |
| 37 |                                 | 1                             |
| 38 |                                 | 1                             |
| 39 |                                 | 1                             |
| 40 |                                 | 1                             |
| 41 |                                 | 1                             |
| 42 |                                 | 1                             |
| 43 |                                 | 1                             |
| 44 |                                 | 1                             |
| 45 |                                 |                               |
| 46 |                                 |                               |
| 47 |                                 |                               |
| 48 |                                 |                               |
| 49 |                                 | 1                             |
| 50 |                                 | 1                             |
| 51 |                                 | 1                             |
| 52 |                                 | 1                             |
| 53 |                                 | 1                             |
| 54 |                                 | 1                             |
| 55 |                                 |                               |
| 56 |                                 |                               |
| 57 |                                 |                               |
| 58 |                                 |                               |
| 59 |                                 |                               |
| 60 |                                 |                               |

Confidential

|    |   |   |
|----|---|---|
| 1  |   |   |
| 2  |   | 1 |
| 3  |   | 1 |
| 4  |   | 1 |
| 5  |   | 1 |
| 6  |   | 1 |
| 7  |   | 1 |
| 8  |   | 1 |
| 9  |   | 1 |
| 10 |   | 1 |
| 11 | 1 |   |
| 12 |   |   |
| 13 |   | 1 |
| 14 |   |   |
| 15 |   | 1 |
| 16 |   |   |
| 17 |   |   |
| 18 |   |   |
| 19 |   |   |
| 20 |   |   |
| 21 |   |   |
| 22 |   |   |
| 23 |   |   |
| 24 |   |   |
| 25 |   |   |
| 26 |   |   |
| 27 |   |   |
| 28 |   |   |
| 29 |   |   |
| 30 |   |   |
| 31 |   |   |
| 32 |   |   |
| 33 |   |   |
| 34 |   |   |
| 35 |   |   |
| 36 |   |   |
| 37 |   |   |
| 38 |   |   |
| 39 |   |   |
| 40 |   |   |
| 41 |   |   |
| 42 |   |   |
| 43 |   |   |
| 44 |   |   |
| 45 |   |   |
| 46 |   |   |
| 47 |   |   |
| 48 |   |   |
| 49 |   |   |
| 50 |   |   |
| 51 |   |   |
| 52 |   |   |
| 53 |   |   |
| 54 |   |   |
| 55 |   |   |
| 56 |   |   |
| 57 |   |   |
| 58 |   |   |
| 59 |   |   |
| 60 |   |   |

Confidential

Appendix 2: Top Selling Dr

20

1  
2  
3  
4  
5  
6  
7  
8  
9  
10  
11  
12  
13  
14  
15  
16  
17  
18  
19  
20  
21  
22  
23  
24  
25  
26  
27  
28  
29  
30  
31  
32  
33  
34  
35  
36  
37  
38  
39  
40  
41  
42  
43  
44  
45  
46  
47  
48  
49

2013

| Generic name       | Brand name | Therapeutic rating (PMPRB and/or Prescribe) |                           |                               | Generic name       | Brand name |
|--------------------|------------|---------------------------------------------|---------------------------|-------------------------------|--------------------|------------|
|                    |            | Major therapeutic gain                      | Moderate therapeutic gain | Little or no therapeutic gain |                    |            |
| Adalimumab         | Humira     |                                             |                           | 1                             | Adalimumab         | Humira     |
| Aripiprazole       | Abilify    |                                             |                           | 1                             | Aripiprazole       | Abilify    |
| Atorvastatin       | Lipitor    |                                             |                           | 1                             | Atorvastatin       | Lipitor    |
| Bevacizumab        | Avastin    |                                             |                           | 1                             | Bevacizumab        | Avastin    |
| Bortezomib         | Velcade    |                                             |                           | 1                             | Bortezomib         | Velcade    |
| Celecoxib          | Celebrex   |                                             |                           | 1                             | Celecoxib          | Celebrex   |
| Dabigatran         | Pradaxa    |                                             |                           | 1                             | Dabigatran         | Pradaxa    |
| Darbepoetin alfa   | Aranesp    |                                             |                           | 1                             | Darbepoetin alpha  | Aranesp    |
| Donepezil          | Aricept    | 1                                           |                           |                               | Duloxetine         | Cymbalta   |
| Duloxetine         | Cymbalta   |                                             |                           | 1                             | Escitaloprim       | Cipralex   |
| Dutasteride        | Avodart    |                                             |                           | 1                             | Esomeprazole       | Nexium     |
| Escitaloprim       | Cipralex   |                                             |                           | 1                             | Etanercept         | Enbrel     |
| Esomeprazole       | Nexium     |                                             |                           | 1                             | Ezetimibe          | Ezetrol    |
|                    |            |                                             |                           | 1                             |                    |            |
| Etanercept         | Enbrel     | 1                                           |                           |                               | Glatiramer         | Copaxone   |
| Ezetimibe          | Ezetrol    |                                             |                           | 1                             | Golimumab          | Simponi    |
| Glatiramer         | Copaxone   |                                             |                           | 1                             | Infliximab         | Remicade   |
| Imatinib           | Gleevec    | 1                                           |                           |                               | Interferon Beta-1A | Rebif      |
| Infliximab         | Remicade   |                                             | 1                         |                               | Oxaliplatin        | Eloxatin   |
| Interferon Beta-1A | Rebif      |                                             | 1                         |                               | Perindopril        | Coversyl   |
| Oxaliplatin        | Eloxatin   |                                             |                           | 1                             | Ranibizumab        | Lucentis   |
| Perindopril        | Coversyl   |                                             |                           | 1                             | Rituximab          | Rituxan    |
| Pregabalin         | Lyrica     |                                             |                           | 1                             | Rivaroxaban        | Xarelto    |
| Ranibizumab        | Lucentis   | 1                                           |                           |                               | Rosuvastatin       | Crestor    |
| Rituximab          | Rituxan    | 1                                           |                           |                               | Sitagliptin        | Januvia    |
| Rosuvastatin       | Crestor    |                                             |                           | 1                             | Sofosbuvir         | Sovaldi    |



|    |                  |                   |   |                   |                   |                        |
|----|------------------|-------------------|---|-------------------|-------------------|------------------------|
| 1  |                  |                   |   |                   |                   |                        |
| 2  | Sitagliptin      | Januvia           | 1 | Tadalafil         | Cialis            |                        |
| 3  | Tadalafil        | Cialis            | 1 | Tiotropium        | Spriva            |                        |
| 4  | Tiotropium       | Spriva            | 1 | Trastuzumab       | Herceptin         |                        |
| 5  | Trastuzumab      | Herceptin         | 1 | Ustekinumab       | Stelara           |                        |
| 6  | Ustekinumab      | Stelara           | 1 |                   | Advair 250 Diskus |                        |
| 7  |                  |                   |   |                   |                   | <b>Therapeutic Eva</b> |
| 8  |                  |                   |   |                   |                   |                        |
| 9  |                  |                   |   |                   |                   |                        |
| 10 | Budesonide and   | Symbicort         |   | Budesonide and    | Symbicort         |                        |
| 11 | formoterol       |                   |   | formoterol        |                   |                        |
| 12 | Dalteparin       | Fragmin           |   | Dalteparin        | Fragmin           |                        |
| 13 | Efavirenz and    | Atripla           |   | Efavirenz and     | Atripla           |                        |
| 14 | emtricitabine    |                   |   | emtricitabine and |                   |                        |
| 15 | and tenofovir    |                   |   | tenofovir         |                   |                        |
| 16 | Emtricitabine    | Truvada           |   | Emtricitabine and | Truvada           |                        |
| 17 | and tenofovir    |                   |   | tenofovir         |                   |                        |
| 18 | Epoetin alfa     | Eprex             |   | Epoetin alfa      | Eprex             |                        |
| 19 |                  | Neupogen          |   | Filgrastim        | Neupogen          |                        |
| 20 | Filgrastim       |                   |   |                   |                   |                        |
| 21 | Fluticasone      | Advair            |   | Fluticasone and   | Advair 250        |                        |
| 22 | and salmeterol   |                   |   | salmeterol        |                   |                        |
| 23 | Fluticasone      | Advair Diskus     |   | Fluticasone and   | Advair 500 Diskus |                        |
| 24 | and salmeterol   |                   |   | salmeterol        |                   |                        |
| 25 | Fluticasone      | Flovent HFA       |   | Fluticasone       | Flovent HFA       |                        |
| 26 | Hydromorphon     | Hydromorph Contin |   | Hydromorphone     | Hydromorph Contin |                        |
| 27 | Insulin glargine | Lantus            |   | Insulin glargine  | Lantus            |                        |
| 28 | Insulin glargine | Lantus Solostar   |   | Insulin glargine  | Lantus SoloStar   |                        |
| 29 | Methylphenidat   | Concerta          |   | Methylphenidate   | Concerta          |                        |
| 30 | e                |                   |   |                   |                   |                        |
| 31 | Oxycodone        | OxyNEO            |   | Oxycodone         | OxyNEO            |                        |
| 32 | Pantoprazole     | Tecta             |   | Paliperidone      | Invega Sustenna   |                        |
| 33 | magnesium        |                   |   |                   |                   |                        |
| 34 | Sitagliptin and  | Janumet           |   | Pantoprazole      | Tecta             |                        |
| 35 | metformin        |                   |   | magnesium         |                   |                        |
| 36 |                  |                   |   |                   |                   |                        |
| 37 |                  |                   |   |                   |                   |                        |
| 38 |                  |                   |   |                   |                   |                        |
| 39 |                  |                   |   |                   |                   |                        |
| 40 |                  |                   |   |                   |                   |                        |
| 41 |                  |                   |   |                   |                   |                        |
| 42 |                  |                   |   |                   |                   |                        |
| 43 |                  |                   |   |                   |                   |                        |
| 44 |                  |                   |   |                   |                   |                        |
| 45 |                  |                   |   |                   |                   |                        |
| 46 |                  |                   |   |                   |                   |                        |
| 47 |                  |                   |   |                   |                   |                        |
| 48 |                  |                   |   |                   |                   |                        |
| 49 |                  |                   |   |                   |                   |                        |

1  
2  
3  
4  
5  
6  
7  
8  
9  
10  
11  
12  
13  
14  
15  
16  
17  
18  
19  
20  
21  
22  
23  
24  
25  
26  
27  
28  
29  
30  
31  
32  
33  
34  
35  
36  
37  
38  
39  
40  
41  
42  
43  
44  
45  
46  
47  
48  
49

Sitagliptin and  
metformin                      Janumet

Confidential

1  
2 **ugs by Dollar Amount, by Years**

3 **2014** **2015**

| Therapeutic rating (PMPRB and/or Prescribe) |                           |                               | Generic name              | Brand name | Therapeutic rating (PMPRB and/o |                           |
|---------------------------------------------|---------------------------|-------------------------------|---------------------------|------------|---------------------------------|---------------------------|
| Major therapeutic gain                      | Moderate therapeutic gain | Little or no therapeutic gain |                           |            | Major therapeutic gain          | Moderate therapeutic gain |
|                                             |                           | 1                             | Adalimumab                | Humira     |                                 |                           |
|                                             |                           | 1                             | Aflibercept               | Eylea      |                                 | 1                         |
|                                             |                           | 1                             | Aripiprazole              | Abilify    |                                 |                           |
|                                             |                           | 1                             | Bevacizumab               | Avastin    |                                 |                           |
|                                             |                           | 1                             | Dabigatran                | Pradaxa    |                                 |                           |
|                                             |                           | 1                             | Darbepoetin alpha         | Aranesp    |                                 |                           |
|                                             |                           | 1                             | Dimethyl fumarate         | Tecfidera  |                                 |                           |
|                                             |                           | 1                             | Duloxetine                | Cymbalta   |                                 |                           |
|                                             |                           | 1                             | Esomeprazole              | Nexium     |                                 |                           |
|                                             |                           | 1                             | Etanercept                | Enbrel     | 1                               |                           |
|                                             |                           | 1                             | Golimumab                 | Simponi    |                                 |                           |
| 1                                           |                           |                               | Infliximab                | Remicade   |                                 | 1                         |
|                                             |                           |                               | Lesipasvir and sofosbuvir | Harvoni    |                                 |                           |
|                                             |                           | 1                             |                           |            |                                 |                           |
|                                             |                           | 1                             | Liraglutide               | Victoza    |                                 |                           |
|                                             |                           | 1                             | Lisdexamfetamine          | Vyvanse    |                                 |                           |
|                                             | 1                         |                               | Omalizumab                | Xolair     |                                 |                           |
|                                             | 1                         |                               | Oxaliplatin               | Eloxatin   |                                 |                           |
|                                             |                           | 1                             | Perindopril               | Coversyl   |                                 |                           |
|                                             |                           | 1                             | Ranibizumab               | Lucentis   | 1                               |                           |
| 1                                           |                           |                               | Rituximab                 | Rituxan    | 1                               |                           |
| 1                                           |                           |                               | Rivaroxaban               | Xarelto    |                                 |                           |
|                                             |                           | 1                             | Rosuvastatin              | Crestor    |                                 |                           |
|                                             |                           | 1                             | Sitagliptin               | Januvia    |                                 |                           |
|                                             |                           | 1                             | Sofosbuvir                | Sovaldi    | 1                               |                           |
| 1                                           |                           |                               | Tadalafil                 | Cialis     |                                 |                           |

1  
2  
3  
4  
5  
6  
7  
8  
9  
10  
11  
12  
13  
14  
15  
16  
17  
18  
19  
20  
21  
22  
23  
24  
25  
26  
27  
28  
29  
30  
31  
32  
33  
34  
35  
36  
37  
38  
39  
40  
41  
42  
43  
44  
45  
46  
47  
48  
49

uation Not Available

|   |                             |                   |
|---|-----------------------------|-------------------|
| 1 | Tiotropium                  | Spriva            |
| 1 | Trastuzumab                 | Herceptin         |
| 1 | Ustekinumab                 | Stelara           |
| 1 | Valacyclovir                | Valtrex           |
|   |                             | Advair 250        |
|   | Budesonide and formoterol   | Symbicort         |
|   | Dalteparin                  | Fragmin           |
|   | Emtricitabine and tenofovir | Truvada           |
|   | Epoetin alfa                | Eprex             |
|   | Filgrastim                  | Neupogen          |
|   | Fluticasone and salmeterol  | Advair 250 Diskus |
|   | Fluticasone and salmeterol  | Advair 500 Diskus |
|   | Fluticasone                 | Flovent HFA       |
|   | Hydromorphone               | Hydromorph Contin |
|   | Insulin glargine            | Lantus            |
|   | Insulin glargine            | Lantus SoloStar   |
|   | Methylphenidate             | Concerta          |
|   | Oxycodone                   | OxyNEO            |
|   | Paliperidone                | Invega Sustenna   |
|   | Pantoprazole magnesium      | Tecta             |
|   | Sitagliptin and metformin   | Janumet           |

Confidential

1  
2  
3  
4  
5  
6  
7  
8  
9  
10  
11  
12  
13  
14  
15  
16  
17  
18  
19  
20  
21  
22  
23  
24  
25  
26  
27  
28  
29  
30  
31  
32  
33  
34  
35  
36  
37  
38  
39  
40  
41  
42  
43  
44  
45  
46  
47  
48  
49

1  
2  
3  
4  
5 **r Prescire)**  
6 **Little or no**  
7 **therapeutic**  
8 **gain**  
9  
10 1  
11  
12  
13 1  
14 1  
15 1  
16  
17 1  
18 1  
19 1  
20 1  
21 1  
22  
23 1  
24  
25  
26 1  
27  
28  
29 1  
30 1  
31 1  
32 1  
33 1  
34 1  
35  
36  
37  
38 1  
39 1  
40 1  
41  
42  
43 1  
44  
45  
46  
47  
48  
49

Confidential

1  
2  
3  
4  
5  
6  
7  
8  
9  
10  
11  
12  
13  
14  
15  
16  
17  
18  
19  
20  
21  
22  
23  
24  
25  
26  
27  
28  
29  
30  
31  
32  
33  
34  
35  
36  
37  
38  
39  
40  
41  
42  
43  
44  
45  
46  
47  
48  
49

1  
1  
1  
1

Confidential
